# Supplementary material for: High catalytic performance of palladium nanoparticles supported on multiwalled carbon nanotubes in alkene hydrogenation reactions
Source: Royal Society of Chemistry journal article supplement (doi:10.1039/c3nj00183k), 2013-01-01

## Electronic Supplementary Material

# High catalytic performance of palladium nanoparticles supported on multiwalled carbon nanotubes in alkene hydrogenation reactions

Manuela Cano,<sup>a</sup> Ana M. Benito,<sup>\*a</sup> Wolfgang K. Maser<sup>a</sup> and Esteban P. Urriolabeitia<sup>\*b</sup>

### Table of Contents

|    |                                                                   |
|----|-------------------------------------------------------------------|
| S1 | Calibration of reactant and product vs internal standard (decane) |
| S2 | Formation of cyclohexanone (%) vs time (min), run 1               |
| S3 | Formation of cyclohexanone (%) vs time (min), run 2               |

| mmol cyclohexenone/mmol standard | mmol cyclohexane/mmol standard | Area cyclohexenone/Área standar | Area cyclohexanone/Área standard |
|----------------------------------|--------------------------------|---------------------------------|----------------------------------|
| 1                                | 0                              | 0,538284185                     | 0                                |
| 0,8                              | 0,2                            | 0,411018345                     | 0,114431475                      |
| 0,6                              | 0,4                            | 0,310962145                     | 0,190234583                      |
| 0,4                              | 0,6                            | 0,231070363                     | 0,313550767                      |
| 0,2                              | 0,8                            | 0,112891721                     | 0,417090441                      |
| 0                                | 1                              | 0                               | 0,532548899                      |

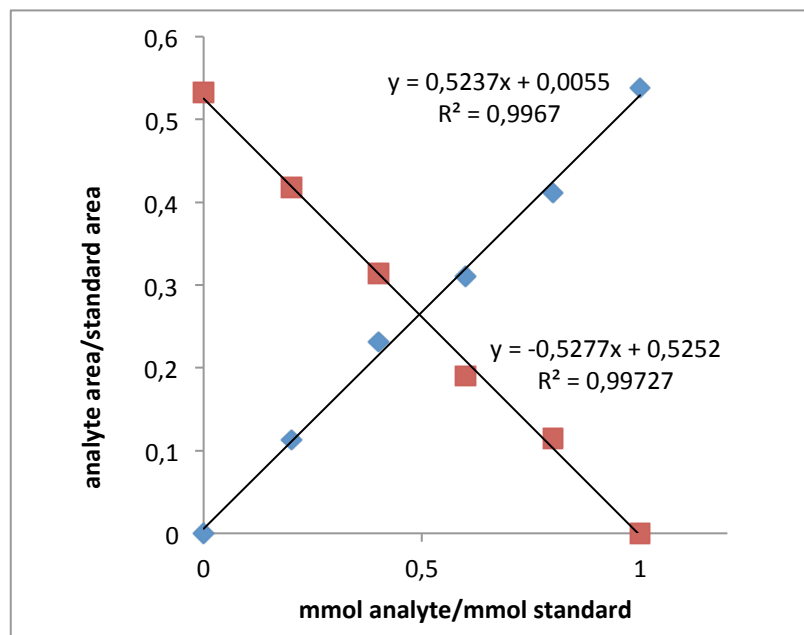

| Time | Run 1                      |     |
|------|----------------------------|-----|
|      | Formation of cyclohexanone |     |
| 0    | 0                          | 0   |
| 15   | 6                          | 6   |
| 30   | 19                         | 19  |
| 45   | 82                         | 82  |
| 60   | 100                        | 100 |

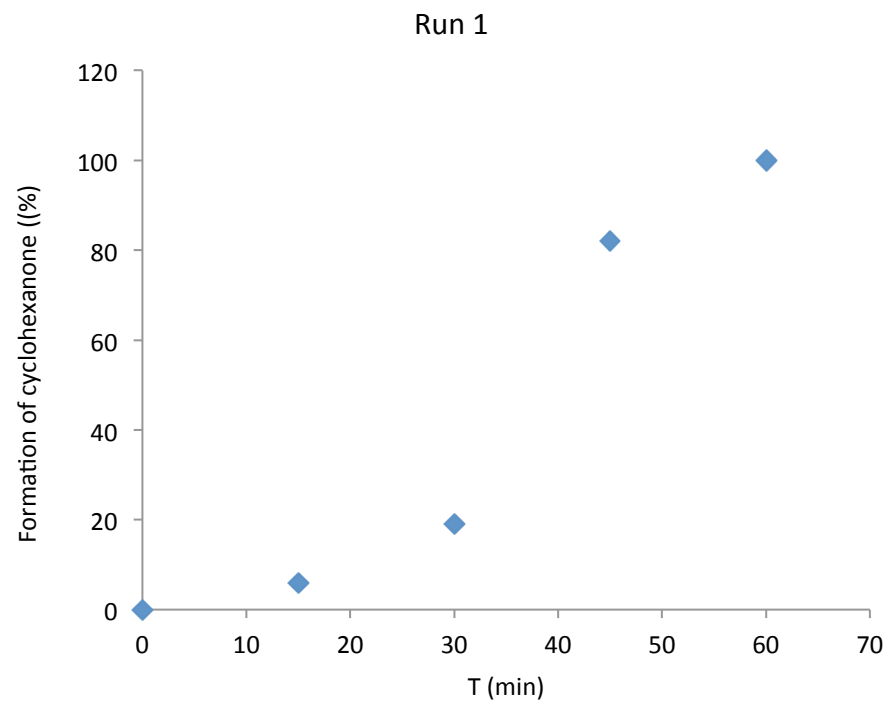

| Time | Run 2                      |     |
|------|----------------------------|-----|
|      | Formation of cyclohexanone |     |
| 0    | 0                          | 0   |
| 15   | 15                         | 15  |
| 30   | 40                         | 40  |
| 45   | 64                         | 64  |
| 60   | 88                         | 88  |
| 75   | 100                        | 100 |

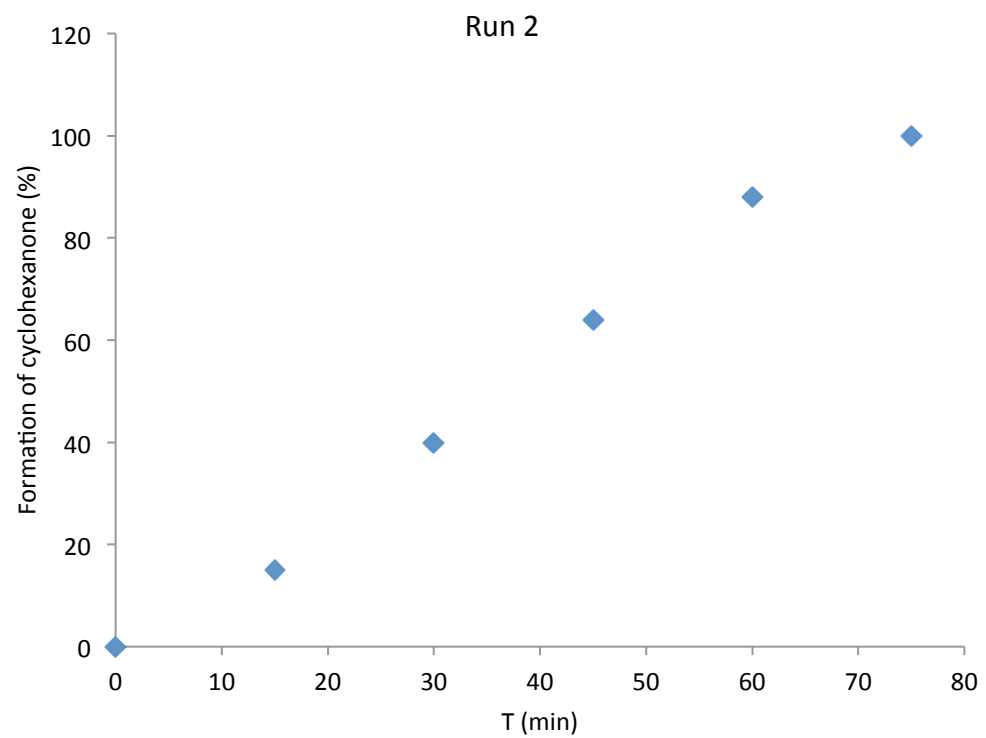

Supplement: c3nj00183k.pdf [file c3nj00183k.pdf]
